# Supplementary material for: Large pore-sized organosilica nanoparticles with controlled release of glucose oxidase for tumor-specific cascaded catalytic therapy
Source: Royal Society of Chemistry journal article supplement (doi:10.1039/d5bm01399b), 2025-12-01
Supplement: d5bm01399b1.pdf [file d5bm01399b1.pdf]

## Supporting Information for

# Large Pore-Sized Organosilica Nanoparticles with Controlled Release of Glucose Oxidase for Tumor-Specific Cascaded Catalytic Therapy

Xiaobing Zhang,<sup>†ab</sup> Yuhang Huang,<sup>†c</sup> Wennan Li,<sup>†c</sup> Shuping Qu,<sup>†b</sup> YunHou,<sup>c</sup> Hongyu Pan,<sup>b</sup> Qiang Fang,<sup>b</sup> Dong Wu,<sup>\*b</sup>, Chao Zhang,<sup>\*a</sup> Wenpei Fan<sup>\*cd</sup> and Chong Zhang<sup>\*a</sup>

<sup>a</sup> Department of General Surgery, The First Affiliated Hospital of Anhui Medical University, Hefei 230022, China.

<sup>b</sup> Department of Hepatic Surgery, Third Affiliated Hospital of Second Military Medical University, Shanghai 200082, China.

<sup>c</sup> State Key Laboratory of Natural Medicines and Jiangsu Key Laboratory of Drug Discovery for Metabolic Diseases, Center of Advanced Pharmaceuticals and Biomaterials, China Pharmaceutical University, Nanjing 211198, China.

<sup>d</sup> State Key Laboratory of Neurology and Oncology Drug Development, Nanjing 210042, China.

\* Correspondence: wudong1005@sina.com (Dong Wu); 13965053990@163.com (Chao Zhang); wenpei.fan@cpu.edu.cn (Wenpei Fan); chongzhang93@126.com (Chong Zhang).

† These authors contributed equally.

Supplementary figures

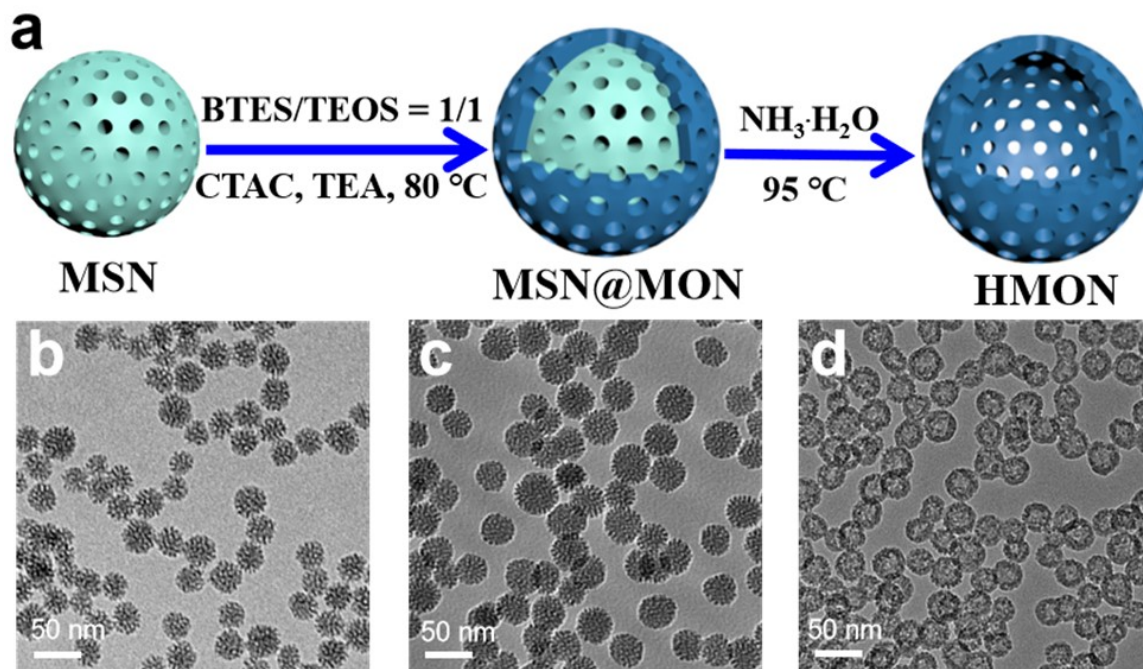

**Figure S1.** (a) Schematic representation for the synthesis of HMON by using the hybrid precursors with a BTES/TEOS ratio of 1:1. (b-d) TEM images of (b) MSN, (c) MSN@MON, and (d) HMON.

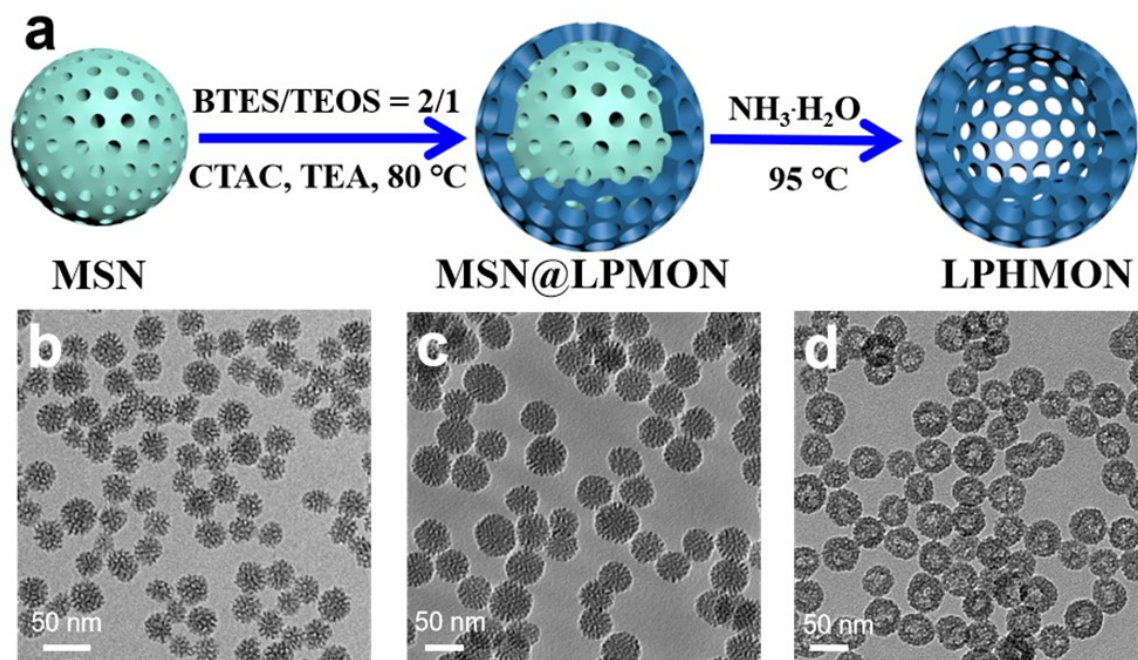

**Figure S2.** (a) Schematic representation for the synthesis of LPHMON by using the hybrid precursors with a BTES/TEOS ratio of 2:1. (b-d) TEM images of (b) MSN, (c) MSN@LPMON, and (d) LPHMON.

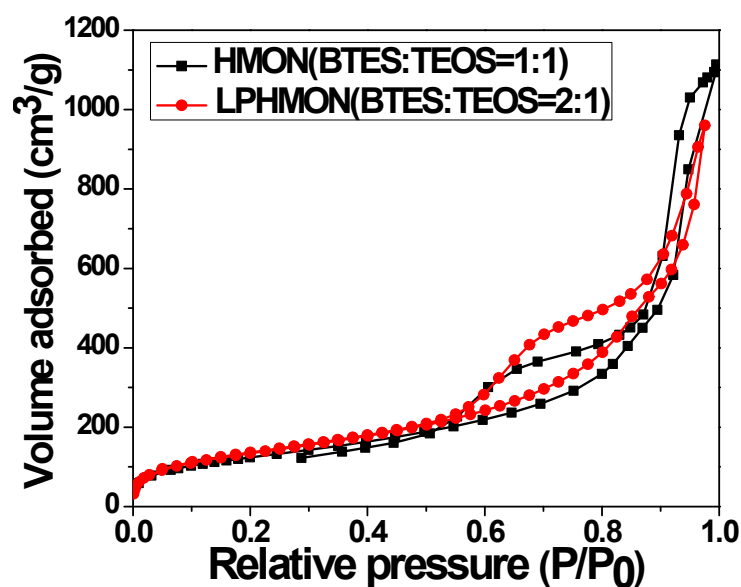

**Figure S3.**  $\text{N}_2$  adsorption-desorption isotherms of HMION and LPHMON synthesized by using the hybrid precursors with BTES/TEOS ratios of 1:1 and 2:1, respectively. The BET surface areas of HMION and LPHMON are  $430.47 \text{ m}^2/\text{g}$  and  $493.02 \text{ m}^2/\text{g}$ , respectively.

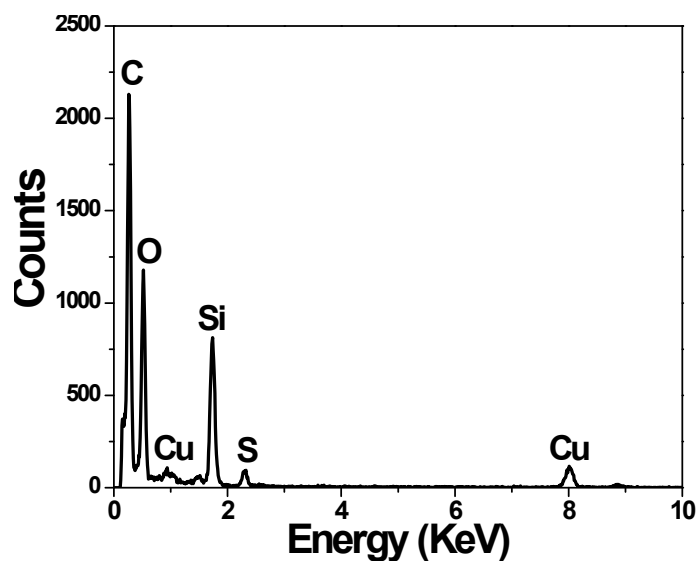

**Figure S4.** Energy-dispersive X-ray spectroscopy (EDS) spectrum of LPHMON-TC. All the major elements (Si, O, C, S, Cu) are shown in this spectrum. The S signal indicates the framework hybridization of LPHMON with thioether moieties, and the Cu signal indicates the surface modification of LPHMON with TA-Cu complex.

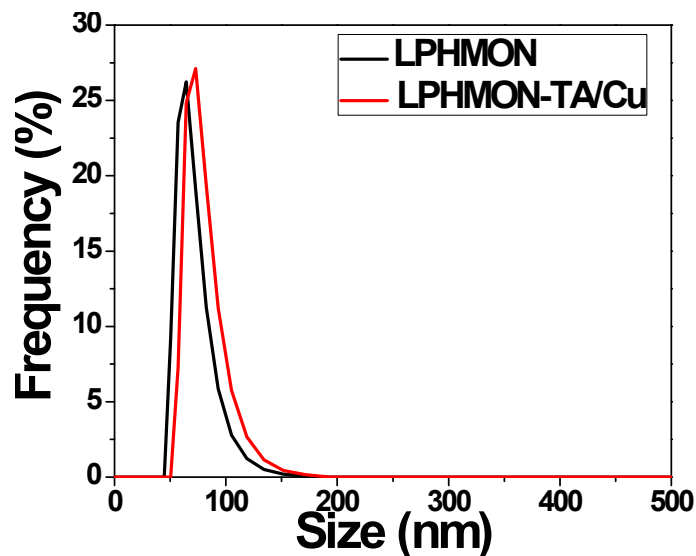

**Figure S5.** Dynamic light scattering (DLS) size measurement of (a) LPHMON and (b) LPHMON-TC in ultrapure water. The average hydrolyzed particle sizes of LPHMON and LPHMON-TC are 67.8 nm and 73.2 nm with polydispersity index (PDI) values of 0.248 and 0.158, respectively.

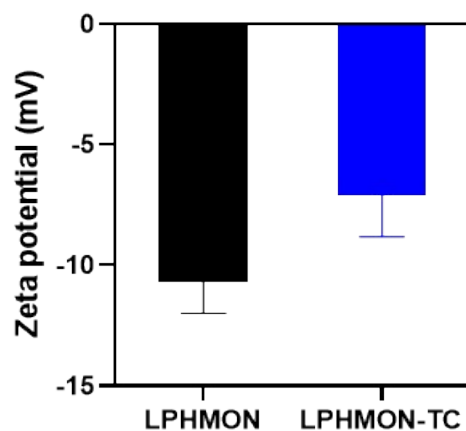

**Figure S6.** Zeta potentials of LPHMON and LPHMON-TC.  $n = 3$ , mean  $\pm$  s.d.

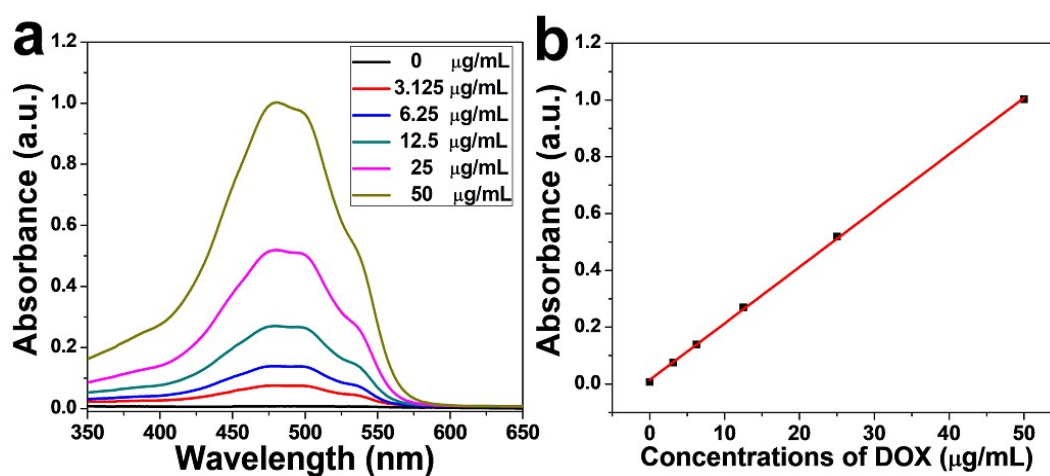

**Figure S7.** (a) UV/Vis absorption spectra of DOX with different concentrations (0, 3.125, 6.25, 12.5, 25, 50  $\mu\text{g/mL}$ ). (b) The standard curve showing the linear relation between the absorbance of DOX at  $\lambda = 480$  nm and its concentration.

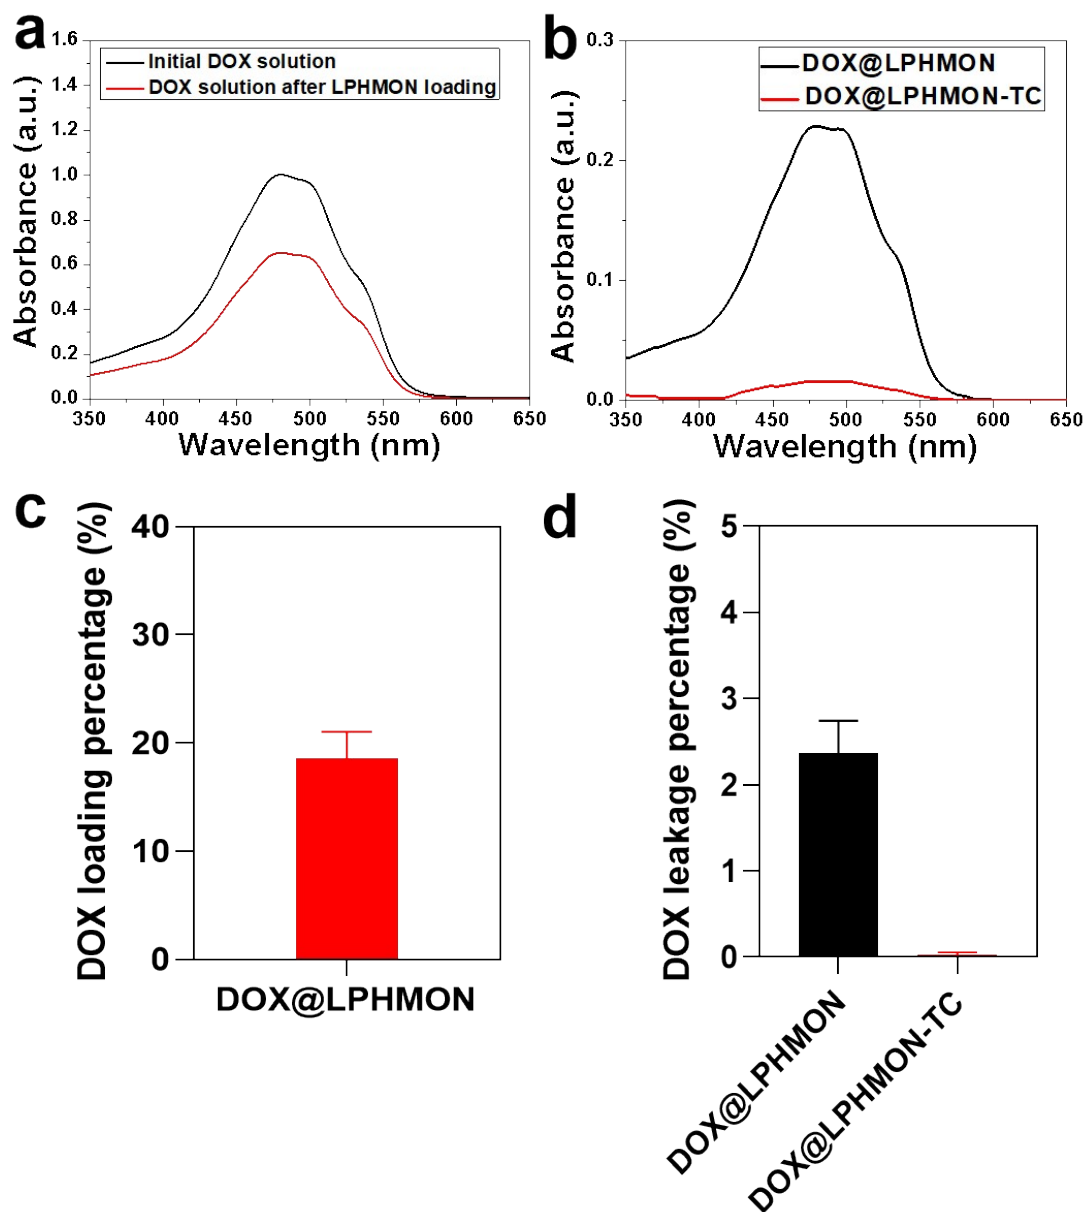

**Figure S8.** (a) UV/Vis absorption spectra of DOX solution before and after loading in LPHMON. The DOX loading capacity of LPHMON is about 18 wt.%. (b) UV/Vis absorption spectra of DOX supernatant of DOX@LPHMON and DOX@LPHMON-TC in water after centrifugation. (c) Loading rate of DOX and (d) release rate of DOX before and after TA-Cu coating. About 2.4% DOX was leaked from DOX@LPHMON after centrifugation, while little (only 0.03%) DOX was leaked, which indicated the advantage of the surface-decorated TA-Cu shell in preventing the DOX leakage from LPHMON.

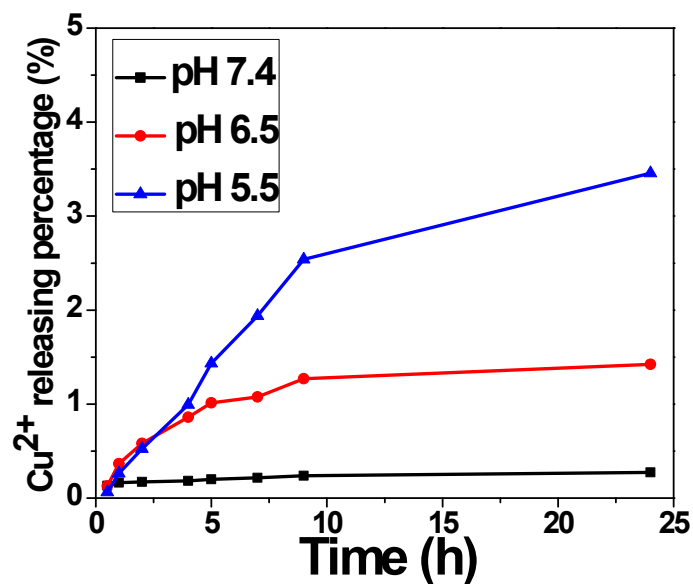

**Figure S9.** Release profiles of  $\text{Cu}^{2+}$  (measured by ICP-OES) from LPHMON-TC during 24 h of incubation in PBS at different pH (7.4, 6.5, 5.5). The specific  $\text{Cu}^{2+}$  release at pH 6.5 and 5.5 indicates the decomposition of TA-Cu complex in the acidic solution.

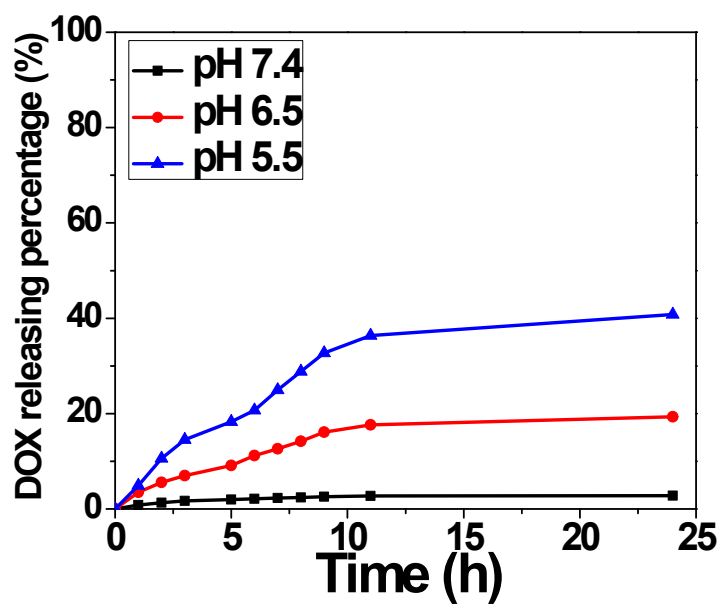

**Figure S10.** Release profiles of DOX from DOX-loaded LPHMON-TC during 24 h of incubation in PBS at different pH (7.4, 6.5, 5.5). The unreleased DOX was attributed to the incomplete disassociation of TA-Cu coating plus the electric attraction between positive DOX molecules and negative silica shell.

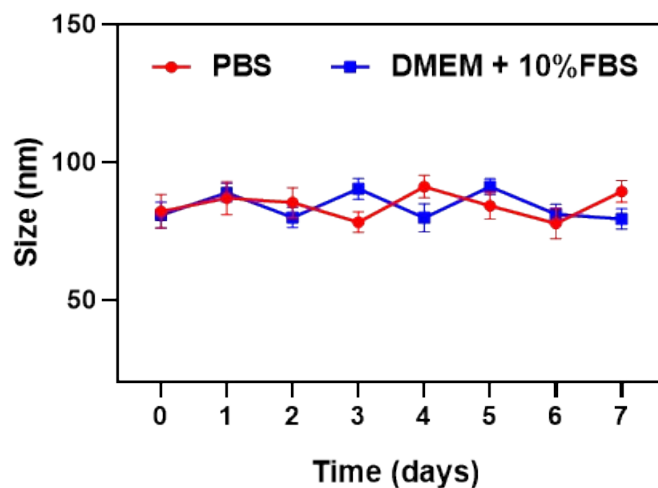

**Figure S11.** Size changes of LPHMON-GTC in PBS and DMEM medium containing 10% FBS for seven days.  $n = 3$ , mean  $\pm$  s.d.

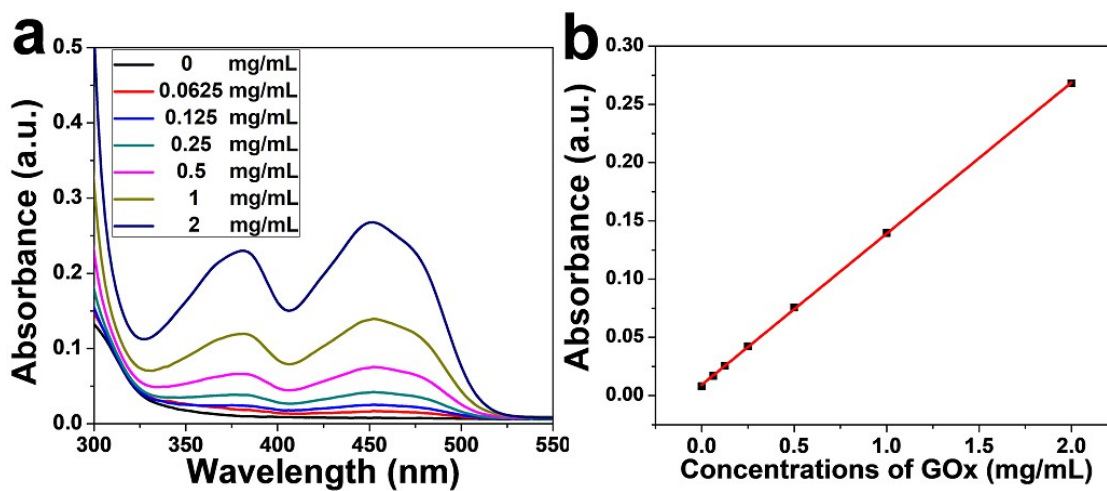

**Figure S12.** (a) UV/Vis absorption spectra of GOx with different concentrations (0, 0.0625, 0.125, 0.25, 0.5, 1, 2 mg/mL). (b) The standard curve showing the linear relation between the absorbance of GOx at  $\lambda = 452$  nm and its concentration.



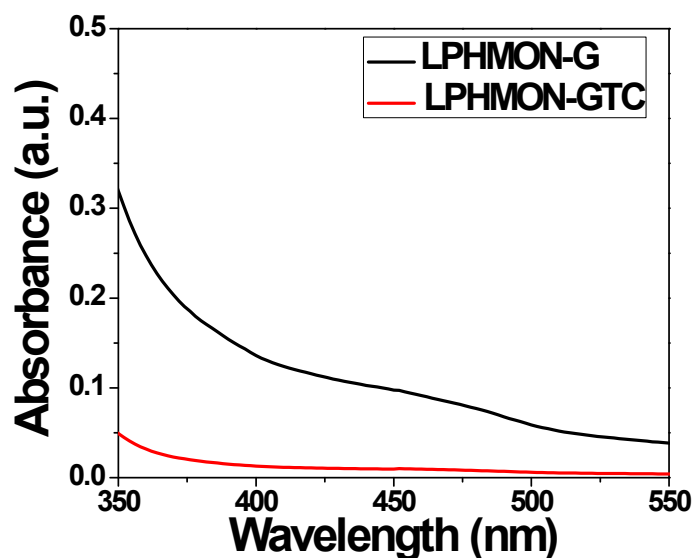

**Figure S13.** UV/Vis absorption spectra of GOx supernatant of LPHMON-G and LPHMON-GTC in water after centrifugation. About 40.1% GOx was leaked from LPHMON-G after centrifugation, while only 0.3% GOx was leaked, which indicated the advantage of the surface-decorated TA-Cu shell in preventing the GOx leakage from LPHMON.

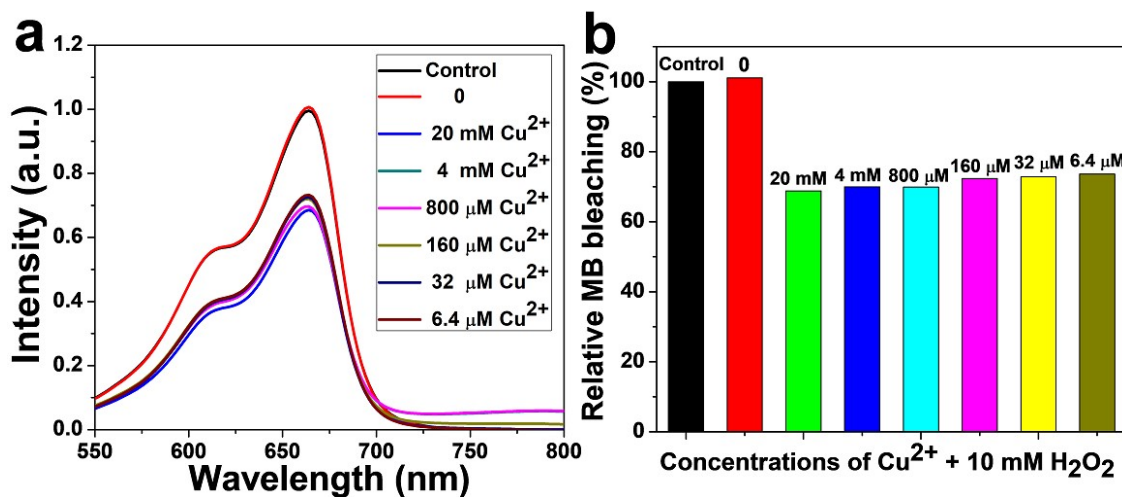

**Figure S14.** Evaluation of  $\bullet\text{OH}$  yield (determined by the decay of MB absorption at  $\lambda = 664 \text{ nm}$ ) arising from the Fenton-like reaction between  $10 \text{ mM H}_2\text{O}_2$  and varied concentrations of  $\text{Cu}^{2+}$ . (a) UV/Vis absorption spectra of methylene blue (MB) in the mixed solution of  $10 \text{ mM H}_2\text{O}_2$  and different concentrations ( $0, 6.4 \mu\text{M}, 32 \mu\text{M}, 160 \mu\text{M}, 800 \mu\text{M}, 4 \text{ mM}, 20 \text{ mM}$ ) of  $\text{Cu}^{2+}$ . (b) Comparison of the MB absorption at  $664 \text{ nm}$  in the

mixed solution of 10 mM H<sub>2</sub>O<sub>2</sub> and different concentrations (0, 6.4 μM, 32 μM, 160 μM, 800 μM, 4 mM, 20 mM) of Cu<sup>2+</sup>. The •OH yield relies little on the Cu<sup>2+</sup> concentration, indicating the catalyst role of Cu<sup>2+</sup> in the Fenton-like reaction for converting H<sub>2</sub>O<sub>2</sub> into •OH.

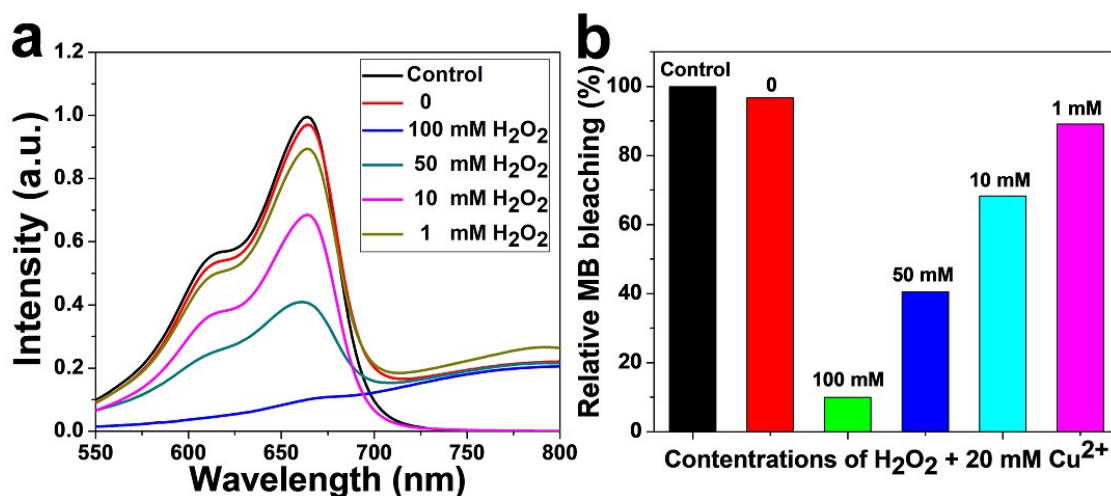

**Figure S15.** Evaluation of •OH yield (determined by the decay of MB absorption at  $\lambda = 664$  nm) arising from the Fenton-like reaction between 20 mM Cu<sup>2+</sup> and varied concentrations of H<sub>2</sub>O<sub>2</sub>. (a) UV/Vis absorption spectra of MB in the mixed solution of 20 mM Cu<sup>2+</sup> and different concentrations (0, 1 mM, 10 mM, 50 mM, 100 mM) of H<sub>2</sub>O<sub>2</sub>. (b) Comparison of the MB absorption at 664 nm in the mixed solution of 20 mM Cu<sup>2+</sup> and different concentrations (0, 1 mM, 10 mM, 50 mM, 100 mM) of H<sub>2</sub>O<sub>2</sub>. The •OH yield depends on the H<sub>2</sub>O<sub>2</sub> concentration.

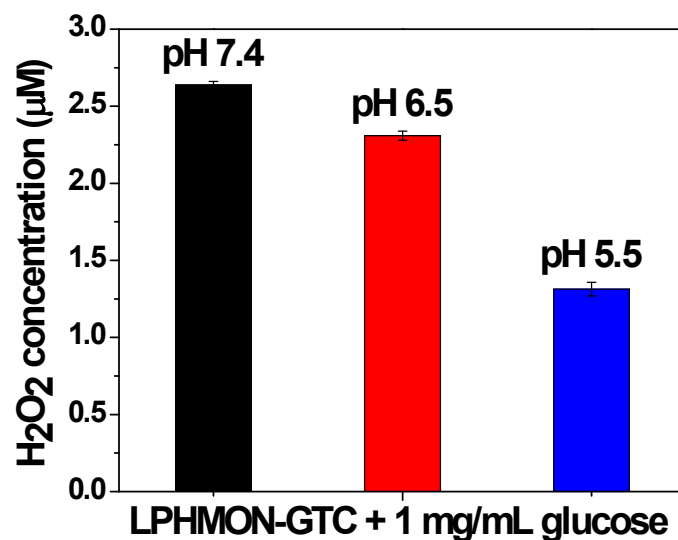

**Figure S16.** The generated H<sub>2</sub>O<sub>2</sub> concentrations after 1 h reaction between LPHMON-GTC and glucose (1 mg/mL) in PBS solutions (initial pH 7.4, 6.5, 5.5). The generated H<sub>2</sub>O<sub>2</sub> concentration was decreased with the lowering pH, which might be attributed to the lower pH-induced release of more Cu<sup>2+</sup> to accelerate the Fenton-like reaction by catalyzing the conversion of more H<sub>2</sub>O<sub>2</sub> into •OH.

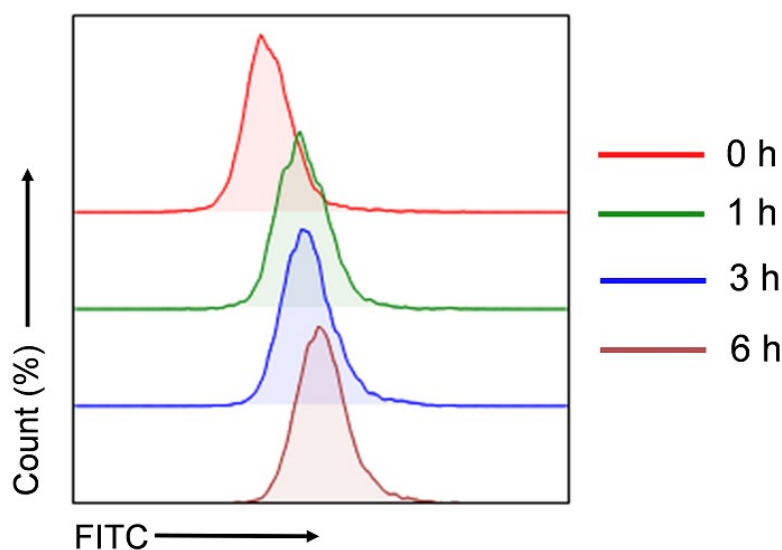

**Figure S17.** Flow cytometry analysis of cell uptake of FITC-labeled LPHMON after incubation with Hepa1-6 cells for 0, 1, 3, and 6 h.

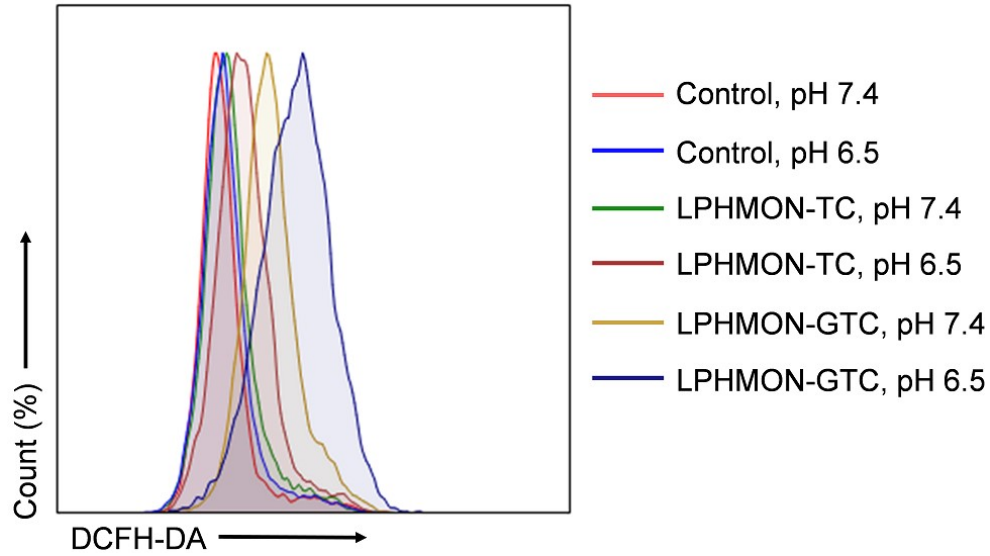

**Figure S18.** Flow cytometry analysis of intracellular ROS generation (using an ROS indicator, DCFH-DA) in Hepa1-6 cells after 6 h of incubation with PBS (control), LPHMON-TC, and LPHMON-GTC at pH 7.4 and 6.5, respectively.

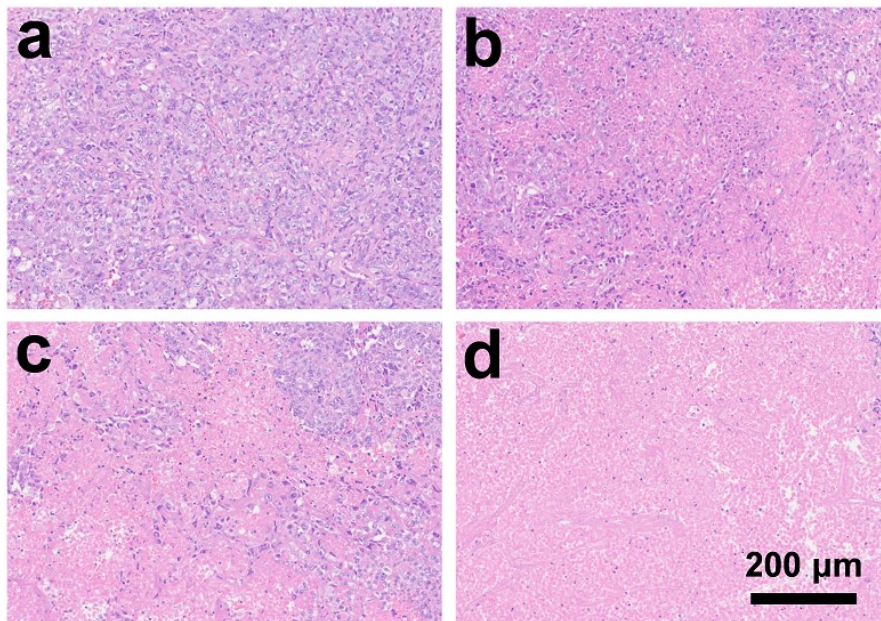

**Figure S19.** H&E-stained tumor sections from Hepa1-6 tumor-bearing mice after treated with (a) PBS, (b) LPHMON-TC, (c) LPHMON-G, and (d) LPHMON-GTC. The degree of tumor cell apoptosis/necrosis reflects the therapeutic effect of the corresponding treatment. Scale bar: 200  $\mu$ m.

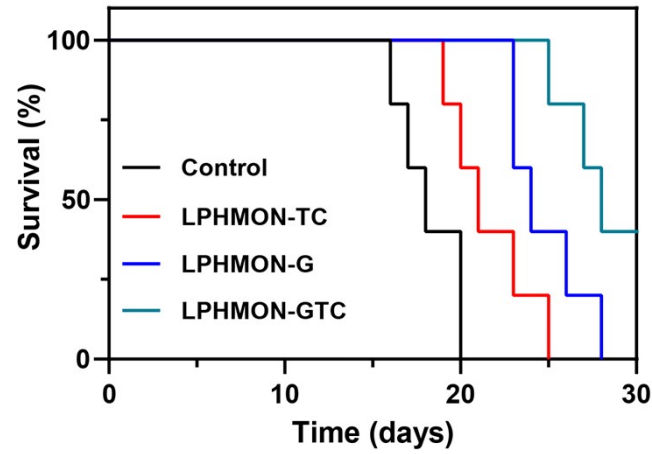

**Figure S20.** Survival curves of Hepa1-6 tumor-bearing mice after different treatments.

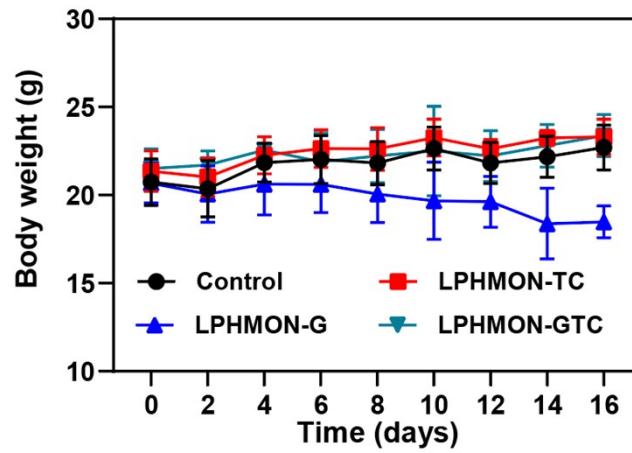

**Figure S21.** Body weight change curves of Hepa1-6 tumor-bearing mice after different treatments. n = 5, mean  $\pm$  s.d.



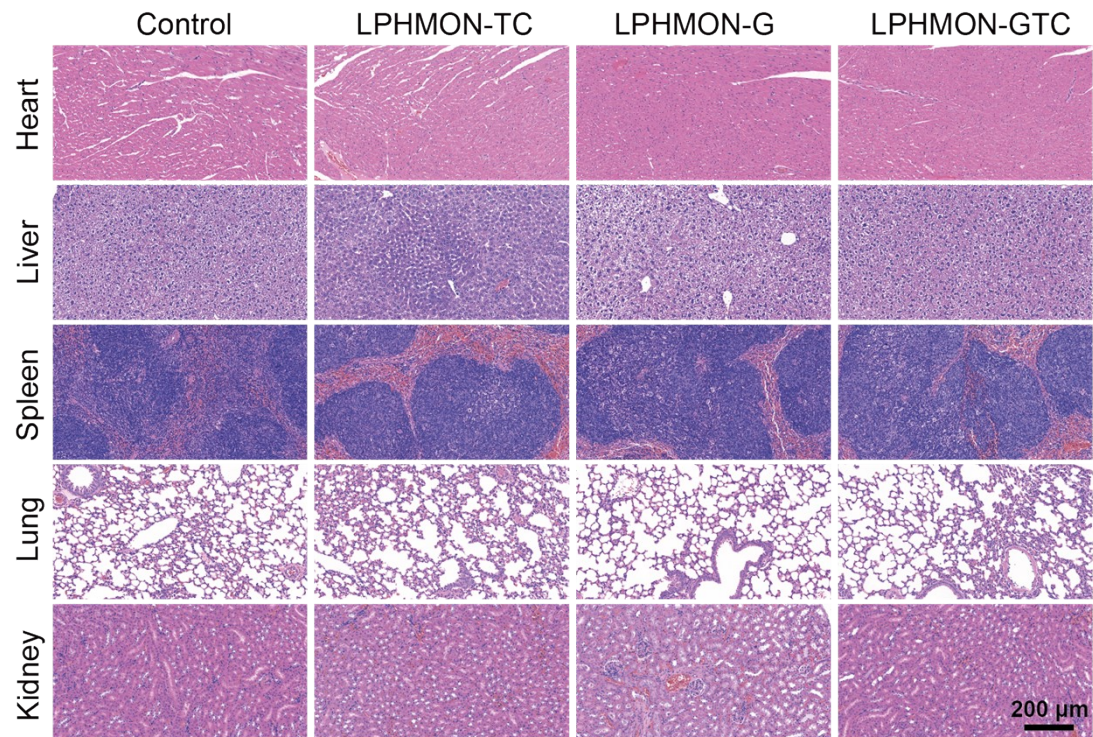

**Figure S22.** Representative H&E staining of major organs from Hepa1-6 tumor-bearing mice after different treatments. Scale bar, 200  $\mu$ m.
